# Supplementary material for: A Method for Increasing the Robustness of Stable Feature Selection for Biomarker Discovery in Molecular Medicine Developed Using Serum Small Extracellular Vesicle Associated miRNAs and the Barrett’s Oesophagus Disease Spectrum
Source: MDPI journal article supplement (doi:10.3390/ijms24087068), 2023-04-11
Supplement: s1 [file s1]

## Supplementary Data.

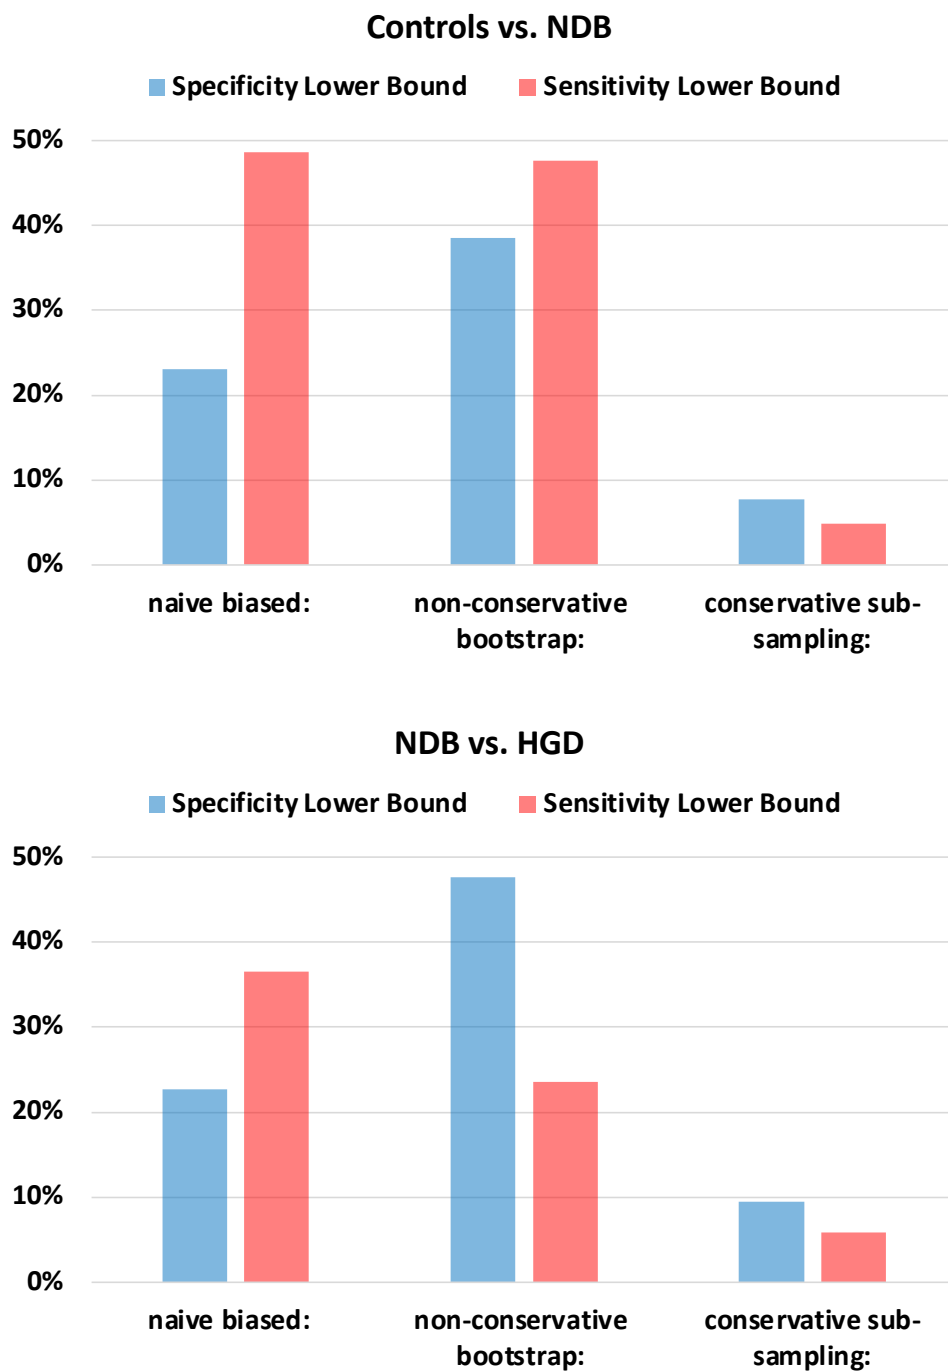

**Figure S1.** Standard nested cross validation: naive biased, non-conservative bootstrap, and *conservative* sub-sampling per sample derived prediction probability 95% confidence interval lower bounds for the estimates of specificity and sensitivity. **Blue bars** are 95% confidence interval lower bounds on the Specificity, and **red bars** are 95% confidence interval lower bounds on the Sensitivity.

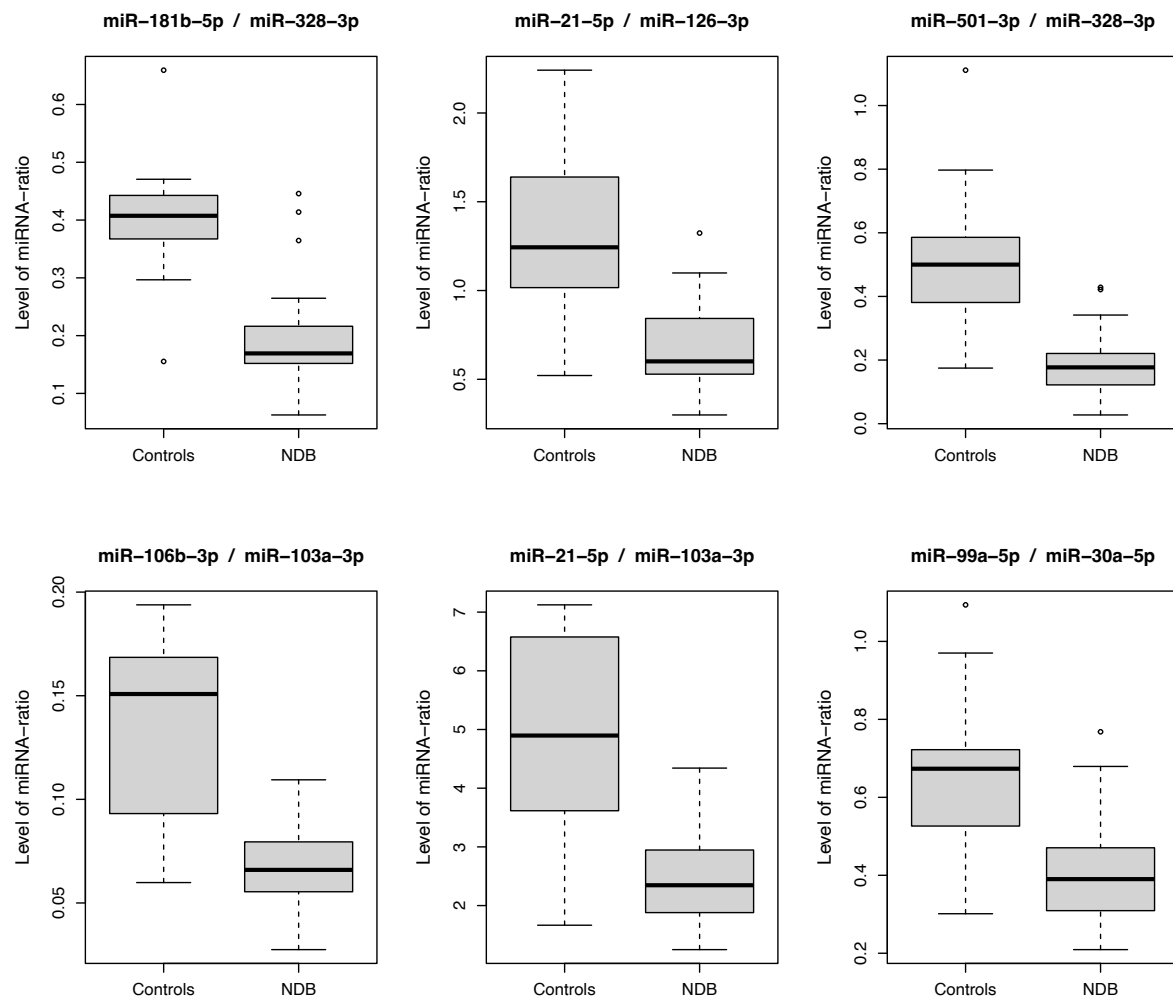

**Figure S2. Controls vs. NDB: boxplots for miRNA-ratios in final models.**  
 Box (25<sup>th</sup> – 75<sup>th</sup> percentiles) and whisker (5<sup>th</sup> and 95<sup>th</sup> percentiles) plots with median values shown by a thick black line. Outlier values are shown by small open circles.

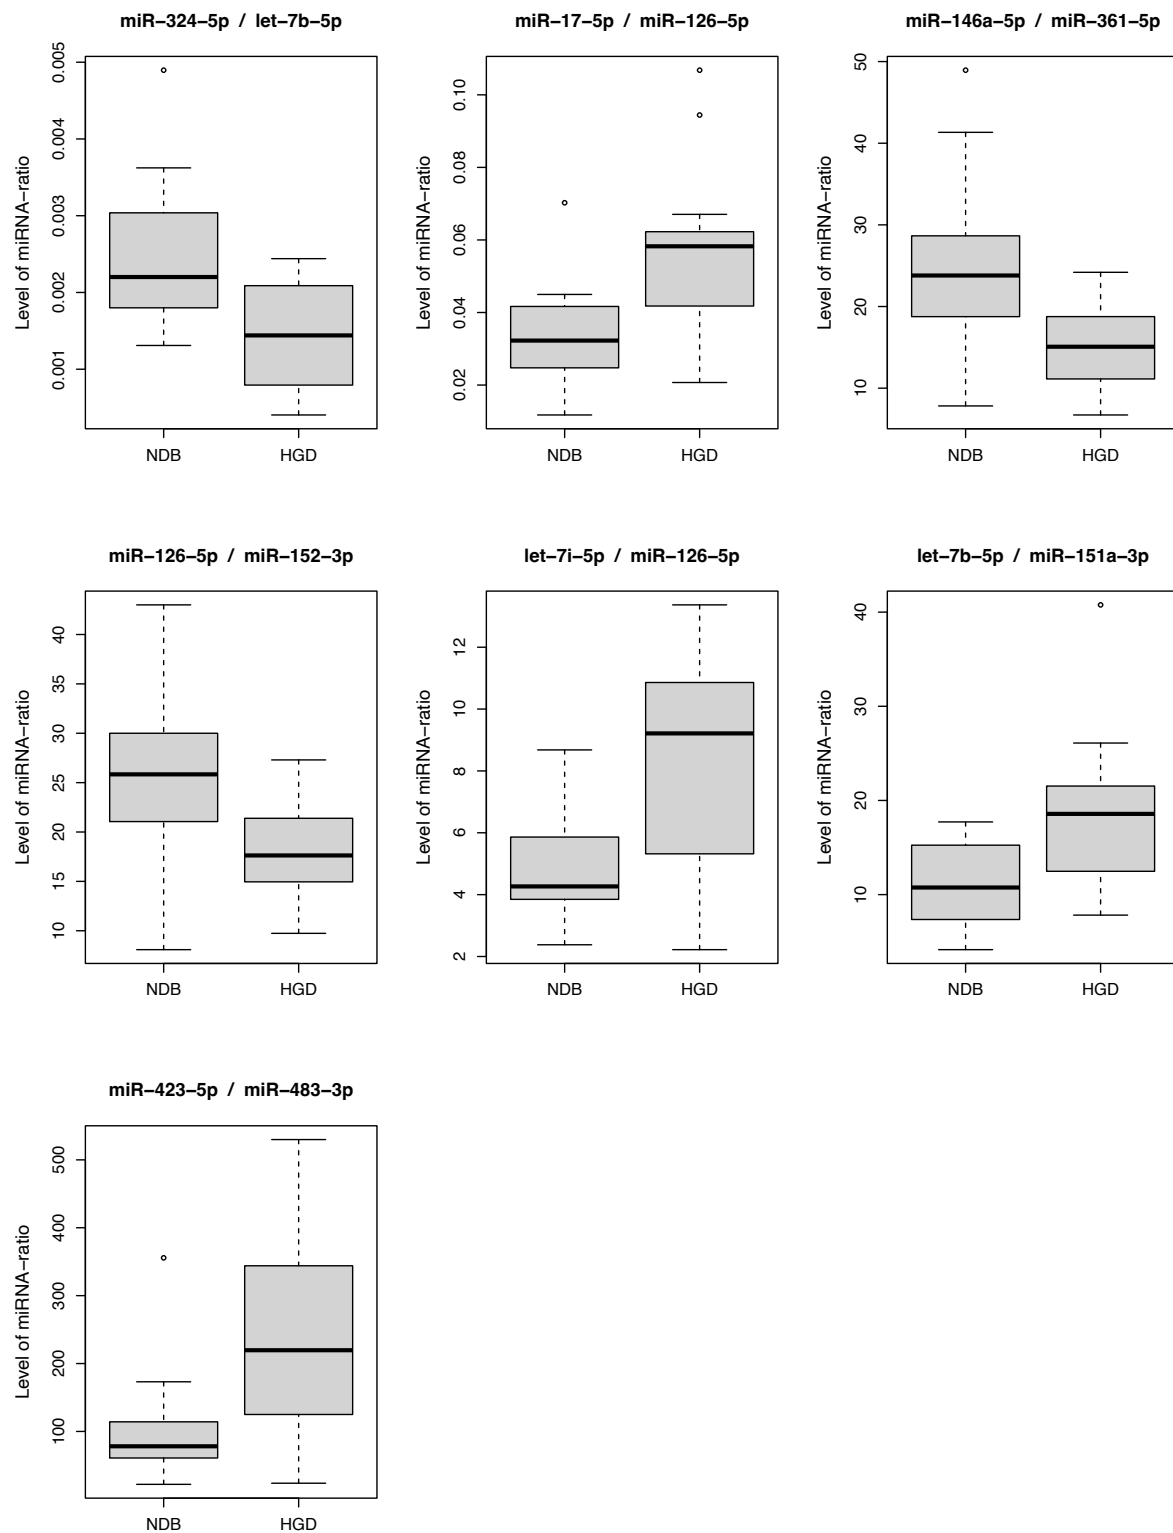

**Figure S3. NDB vs. HGD: boxplots for miRNA-ratios in final models.**

Box (25<sup>th</sup> – 75<sup>th</sup> percentiles) and whisker (5<sup>th</sup> and 95<sup>th</sup> percentiles) plots with median values shown by a thick black line. Outlier values are shown by small open circles.

**a. Non-conservative: Controls vs. NDB**  
**lambda.min**

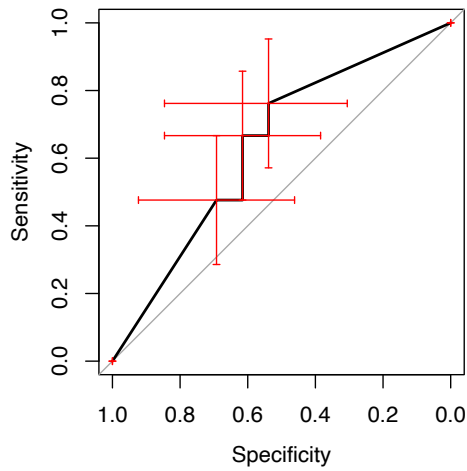

**b. Non-conservative: Controls vs. NDB**  
**lambda.1se**

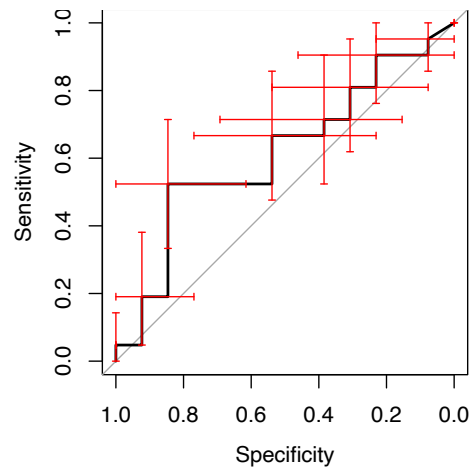

**c. Non-conservative: NDB vs. HGD**  
**lambda.min**

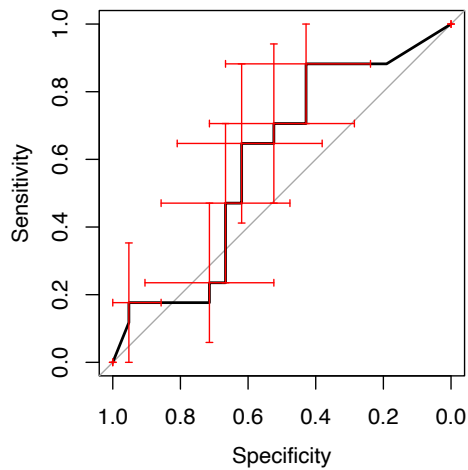

**d. Non-conservative: NDB vs. HGD**  
**lambda.1se**

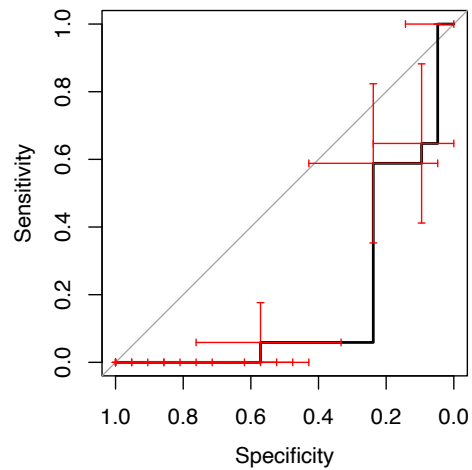

**Figure S4. Effects of increased regularisation on predictive capacity.**

**Lambda.min** refers to the optimum level of penalisation for LASSO regression that minimises the prediction error. **Lambda.1se** refers to an increased level of penalisation for LASSO regression that lies within one standard error of  $\lambda_{\min}$ . ROC curve error bars (red) are non-conservative bootstrapped 95% confidence intervals.

**Supplementary Table S1.** Details of miRNAs in final model miRNA-ratios for Controls vs. NDB.

|   | <b>miRBase v22 ID</b> | <b>miRBase v22 mature sequence</b> | <b>miRbase Accession</b> |
|---|-----------------------|------------------------------------|--------------------------|
| 1 | hsa-miR-181b-5p       | AACAUUCAUUGCUGUCGGUGGGU            | MIMAT0000257             |
| 2 | hsa-miR-328-3p        | CUGGCCUCUCUGCCCUUCCGU              | MIMAT0000752             |
| 3 | hsa-miR-21-5p         | UAGCUUAUCAGACUGAUGUUGA             | MIMAT0000076             |
| 4 | hsa-miR-126-3p        | UCGUACCGUGAGUAAUAAUGCG             | MIMAT0000445             |
| 5 | hsa-miR-501-3p        | AAUGCACCCGGGCAAGGAUUCU             | MIMAT0004774             |
| 6 | hsa-miR-106b-3p       | CCGCACUGUGGGUACUUGCUGC             | MIMAT0004672             |
| 7 | hsa-miR-103a-3p       | AGCAGCAUUGUACAGGGCUAUGA            | MIMAT0000101             |
| 8 | hsa-miR-99a-5p        | AACCCGUAGAUCCGAUCUUGUG             | MIMAT0000097             |
| 9 | hsa-miR-30a-5p        | UGUAAACAUCCUCGACUGGAAG             | MIMAT0000087             |

**Supplementary Table S2.** Details of miRNAs in final model miRNA-ratios for NDB vs. HGD.

|    | <b>miRBase v22 ID</b> | <b>miRBase v22 mature sequence</b> | <b>miRbase Accession</b> |
|----|-----------------------|------------------------------------|--------------------------|
| 1  | hsa-miR-324-5p        | CGCAUCCCCUAGGGCAUUGGUG             | MIMAT0000761             |
| 2  | hsa-let-7b-5p         | UGAGGUAGUAGGUUGUGUGGUU             | MIMAT0000063             |
| 3  | hsa-miR-17-5p         | CAAAGUGCUUACAGUGCAGGUAG            | MIMAT0000070             |
| 4  | hsa-miR-126-5p        | CAUUAUUACUUUUGGUACGCG              | MIMAT0000444             |
| 5  | hsa-miR-146a-5p       | UGAGAACUGAAUUGCAUGGGUU             | MIMAT0000449             |
| 6  | hsa-miR-361-5p        | UUAUCAGAAUCUCCAGGGGUAC             | MIMAT0000703             |
| 7  | hsa-miR-152-3p        | UCAGUGCAUGACAGAACUUGG              | MIMAT0000438             |
| 8  | hsa-let-7i-5p         | UGAGGUAGUAGUUUGUGCUGUU             | MIMAT0000415             |
| 9  | hsa-miR-151a-3p       | CUAGACUGAAGCUCCUUGAGG              | MIMAT0000757             |
| 10 | hsa-miR-423-5p        | UGAGGGGCAGAGAGCGAGACUUU            | MIMAT0004748             |
| 11 | hsa-miR-483-3p        | UCACUCCUCUCCUCCCGUCUU              | MIMAT0002173             |

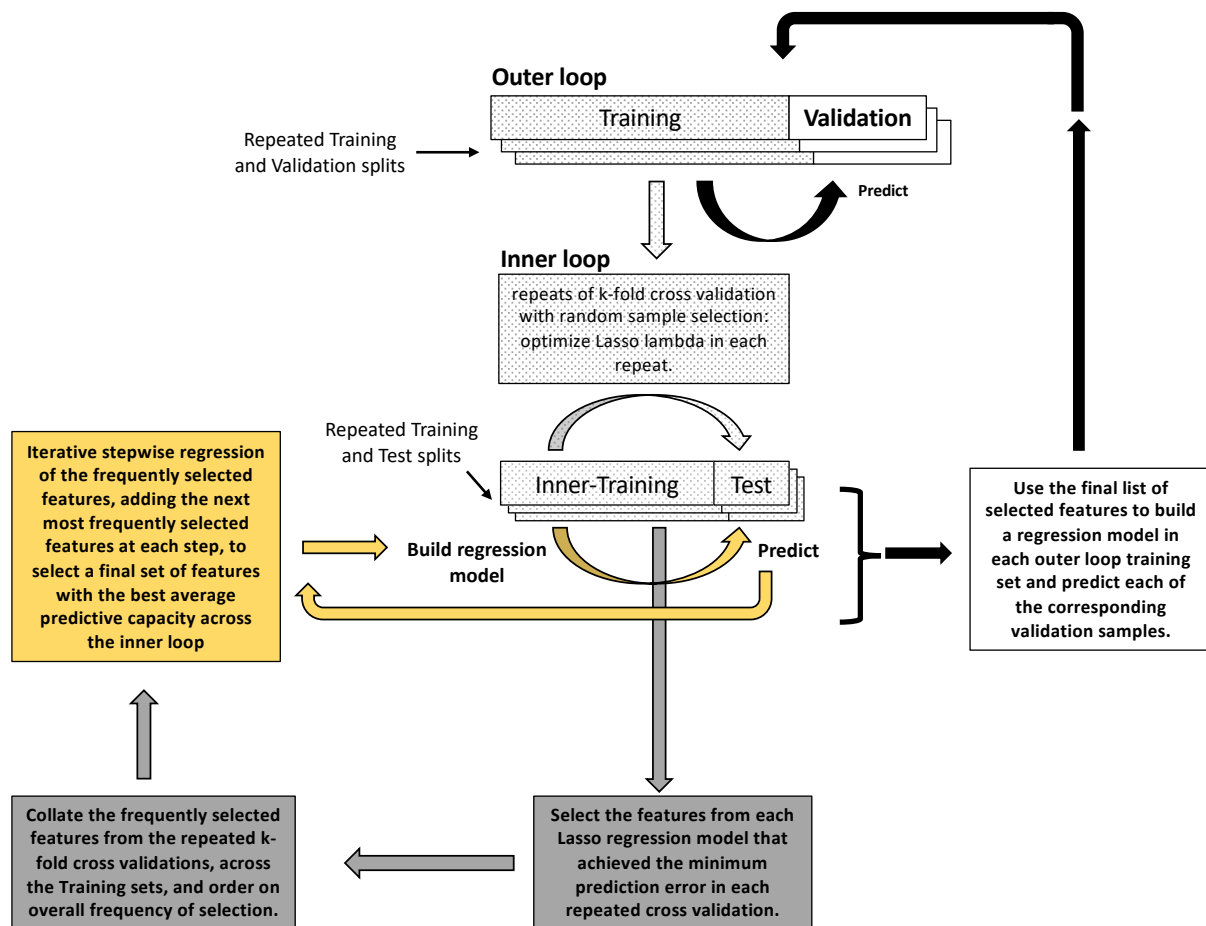

**Supplementary Schema:** Stable nested cross validation (StaVarSel) scheme: In the inner loop the level of regularisation ( $\lambda$ ) for the regression model was optimised via repeated 10-fold cross validation. The miR-ratios derived from applying lasso regression with the optimised  $\lambda$  to each training set were collated, ranked according to frequency of selection, and then subjected to a form of stepwise forward regression to determine the optimum model with the least prediction error. The miR-ratios selected from the inner loop cross validation were used to build regression models in each training set, and these models were then used to make predictions for the held-out samples.
